# Supplementary material
Source: Springer Nature journal article supplement (https://www.springermedizin.de/resource/supplementary/12950_2011_233_MOESM3_ESM.pdf/9558262)

**C3a**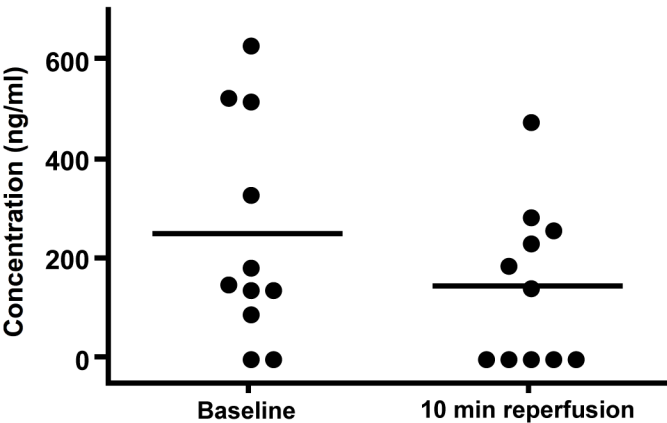**C4d**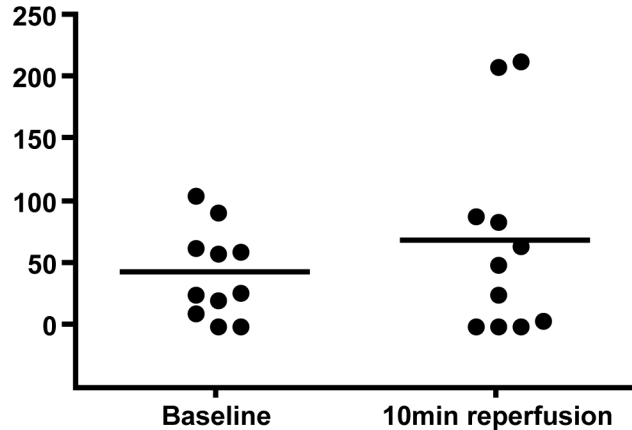

Supplement: MOESM3 [file 9558262]
